# Supplementary material for: A squaraine-based dipicolylamine derivative acting as a turn-on mercury(ii) fluorescent probe in water
Source: Royal Society of Chemistry journal article supplement (doi:10.1039/d0nj00852d), 2020-01-01
Supplement: d0nj00852d1.pdf [file d0nj00852d1.pdf]

Electronic Supplementary Material (ESI) for New Journal of Chemistry.  
This journal is © The Royal Society of Chemistry and the Centre National de la Recherche Scientifique 2020

## Electronic Supplementary Material (ESI)

### A Squaraine-based Dipicolylamine Derivative Acting as a Turn-on Mercury(II) Fluorescent Probe in Water

Catarina V. Esteves,<sup>a,†</sup> Judite Costa,<sup>b</sup> H  l  ne Bernard,<sup>c</sup> Rapha  l Tripi  r,<sup>c</sup> Rita Delgado<sup>a\*</sup>

<sup>a</sup> Instituto de Tecnologia Qu  mica e Biol  gica Ant  nio Xavier, Universidade Nova de Lisboa, Av. da Rep  blica, 2780-157 Oeiras, Portugal.

<sup>b</sup> Research Institute for Medicines (iMed.Ulisboa, Faculdade de Farm  cia, Universidade de Lisboa, Av. Prof. Gama Pinto, 1649-003 Lisboa, Portugal.

<sup>c</sup> Universit   de Brest, UMR-CNRS 6521, SFR SIBSAM, UFR des Sciences et Techniques, 6 avenue Victor le Gorgeu, C.S. 93837 29238 Brest Cedex 3, France.

\*E-mail: delgado@itqb.unl.pt

|          | Content                                                                                                                                                | Page |
|----------|--------------------------------------------------------------------------------------------------------------------------------------------------------|------|
| Table S1 | Squaraine-based sensors for Hg <sup>2+</sup> from the literature and the working medium used                                                           | S2   |
| Table S2 | Overall protonation constants of <b>sbdpa</b> and dpa in aqueous solution                                                                              | S3   |
| Table S3 | Overall stability constants of the complexes of <b>sbdpa</b> and dpa with Hg <sup>2+</sup> , Cu <sup>2+</sup> and Zn <sup>2+</sup> in aqueous solution | S3   |
| Fig. S1  | Absorption and emission spectra of <b>sbdpa</b> in aqueous solution with pH variations                                                                 | S4   |
| Fig. S2  | Absorption and emission spectra of the 1:1 M:L complex of <b>sbdpa</b> with Hg <sup>2+</sup> in aqueous solution                                       | S4   |
| Fig. S3  | Fluorescence intensity change of <b>sbdpa</b> upon titration with Hg(NO <sub>3</sub> ) <sub>2</sub> in aqueous buffered solution                       | S5   |
| Fig. S4  | Species distribution diagrams calculated for the complexes of <b>sbdpa</b> with Cu <sup>2+</sup> and Zn <sup>2+</sup> cations at 2:1 M:L ratio         | S5   |
| Fig. S5  | Competition distribution diagram of the overall amounts of the <b>sbdpa</b> in function of pH                                                          | S6   |
| Fig. S6  | <sup>1</sup> H-NMR spectrum of <b>sbdpa</b> in CDCl <sub>3</sub>                                                                                       | S7   |
| Fig. S7  | <sup>13</sup> C-NMR spectrum of <b>sbdpa</b> in CDCl <sub>3</sub>                                                                                      | S7   |
| Fig. S8  | COSY spectrum of <b>sbdpa</b> in CDCl <sub>3</sub>                                                                                                     | S8   |
| Fig. S9  | HMQC spectrum of <b>sbdpa</b> in CDCl <sub>3</sub>                                                                                                     | S8   |
| Fig. S10 | ESI mass spectrum of <b>sbdpa</b> in H <sub>2</sub> O/MeOH                                                                                             | S9   |
| Fig. S11 | ATR-FTIR spectrum from <b>sbdpa</b> recorded at room temperature                                                                                       | S9   |
| Fig. S12 | Evolution of <sup>1</sup> H-NMR spectra of <b>sbdpa</b> in D <sub>2</sub> O with time at pD 3.39 and pD 7.63                                           | S10  |

**Table S1.** Squaraine-based sensors for Hg<sup>2+</sup> from the literature and the working medium used

| Reference | Authors                      | Medium                                                                                                                    |
|-----------|------------------------------|---------------------------------------------------------------------------------------------------------------------------|
| 9a        | G. Wang <i>et al.</i>        | EtOH/water solutions and pH 7.0 PBS buffer solution                                                                       |
| 9b        | X. Liu <i>et al.</i>         | DMSO, AcOH and SDS solutions                                                                                              |
| 9c        | S. Lee <i>et al.</i>         | MeCN                                                                                                                      |
| 9d        | H. Zhu <i>et al.</i>         | 0.005% TW-80 (Tween-80 or polysorbate 80) at pH 5.0 PB buffer solutions                                                   |
| 9e        | H.-S. So <i>et al.</i>       | MeCN                                                                                                                      |
| 9f        | S.-Y. Lin <i>et al.</i>      | EtOH/water solutions                                                                                                      |
| 9g        | B. A. Rao <i>et al.</i>      | MeCN                                                                                                                      |
| 9h        | Q. Lin <i>et al.</i>         | EtOH/water (30:70, v/v) solutions                                                                                         |
| 9i        | L. Hu <i>et al.</i>          | DMSO/water (1:1, v/v) solutions and pH 8.0 PB buffer with 0.01 mol L <sup>-1</sup> CTMAB (cetyltrimethylammonium bromide) |
| 9j        | K. M. Shafeekh <i>et al.</i> | MeOH                                                                                                                      |
| 9k        | C. Luo <i>et al.</i>         | MeCN and MeCN/water (2:1, v/v) solutions                                                                                  |
| 9l        | C. Chen <i>et al.</i>        | AcOH and AcOH/water (10:90, v/v) solutions                                                                                |
| 9m        | C. Chen <i>et al.</i>        | AcOH/water (40:60, v/v) solution                                                                                          |
| 9n        | Y. Xu <i>et al.</i>          | Aqueous solution with cucurbit[8]uril (CB8)                                                                               |
| 9p        | M. C. Basheer <i>et al.</i>  | DCM                                                                                                                       |
| 9q        | J. V. Ros-Lis <i>et al.</i>  | MeCN/water (1:4, v/v) pH 9.6 CHES buffer solutions                                                                        |
| 9r        | J. V. Ros-Lis <i>et al.</i>  | MeCN/water (20:80, v/v) pH 6.9 HEPES buffer solutions                                                                     |

- 9 (a) G. Wang, W. Xu, H. Yang and N. Fu, Highly Sensitive and Selective Strategy for Imaging Hg<sup>2+</sup> Using Near-Infrared Squaraine Dye in Live Cells and Zebrafish, *Dyes and Pigments*, 2018, **157**, 369–376; (b) X. Liu, N. Li, M. M. Xu, C. Jiang, J. Wang, G. Song and Y. Wang, Dual Sensing Performance of 1,2-Squaraine for the Colorimetric Detection of Fe<sup>3+</sup> and Hg<sup>2+</sup> Ions, *Materials*, 2018, **11**, 1998; (c) S. Lee, B. A. Rao and Y.-A. Son, A Highly Selective Fluorescent Chemosensor for Hg<sup>2+</sup> Based on a Squaraine-bis(rhodamine-B) Derivative: Part II, *Sensors and Actuators B: Chemical*, 2015, **210**, 519–532; (d) H. Zhu, Y. Lin, G. Wang, Y. Chen, X. Lin and N. Fu, A Coordination Driven Deaggregation Approach toward Hg<sup>2+</sup>-specific Chemosensors Based on Thioether Linked Squaraine-Aniline Dyads, *Sensors and Actuators B: Chemical*, 2014, **198**, 201–209; (e) H.-S. So, H.-S. So, B. A. Rao, J. Hwang, K. Yesudas and Y.-A. Son, Synthesis of Novel Squaraine-bis(rhodamine-6G): A Fluorescent Chemosensor for the Selective Detection of Hg<sup>2+</sup>, *Sensors and Actuators B: Chemical*, 2014, **202**: 779–787; (f) S.-Y. Lin, H.-J. Zhu, W.-J. Xu, G.-M. Wang and N.-Y. Fu, A Squaraine Based Fluorescent Probe for Mercury Ion via Coordination Induced Deaggregation Signaling, *Chinese Chem. Lett.*, 2014, **25**, 1291–1295; (g) B. A. Rao, H. Kim and Y.-A. Son, Synthesis of Near-Infrared Absorbing Perylium-Squaraine Dye for Selective Detection of Hg<sup>2+</sup>, *Sensors and Actuators B: Chemical*, 2013, **188**, 847–856; (h) Q. Lin, Y. Huang, J. Fan, R. Wang and N. Fu, A Squaraine and Hg<sup>2+</sup>-based Colorimetric and “Turn on” Fluorescent Probe for Cysteine, *Talanta*, 2013, **114**, 66–72; (i) L. Hu, Y. Zhang, L. Nie, C. Xie and Z. Yan, Colorimetric Detection of Trace Hg<sup>2+</sup> with Near-Infrared Absorbing Squaraine Functionalized by Dibenzo-18-crown-6 and its Mechanism, *Spectrochim. Acta A Mol. Biomol. Spectrosc.*, 2013, **104**, 87–91; (j) K. M. Shafeekh, M. K. A. Rahim, M. C. Basheer, C. H. Suresh and S. Das, Highly Selective and Sensitive Colourimetric Detection of Hg<sup>2+</sup> Ions by Unsymmetrical Squaraine Dyes, *Dyes and Pigments*, 2013, **96**, 714–721; (k) C. Luo, Q. Zhou, B. Zhang and X. Wang, A New Squaraine and Hg<sup>2+</sup>-based Chemosensor with Tunable Measuring Range for Thiol-Containing Amino Acids, *New J. Chem.*, 2011, **35**, 45–48; (l) C. Chen, H. Dong, Y. Chen, L. Guo, Z. Wang, J. J. Sun and N. Fu, Dual-mode Unsymmetrical Squaraine-based Sensor for Selective Detection of Hg<sup>2+</sup> in Aqueous Media, *Org. Biomol. Chem.*, 2011, **9**, 8195–8201; (m) C. Chen, R. Wang, L. Guo, N. Fu, H. Dong, Y. Yuan, A Squaraine-based Colorimetric and “Turn on” Fluorescent Sensor for Selective Detection of Hg<sup>2+</sup> in an Aqueous Medium, *Org. Lett.*, 2011, **13**, 1162–1165; (n) Y. Xu, M. J. Panzner, X. Li, W. J. Youngs and Y. Pang, Host-guest Assembly of Squaraine Dye in Cucurbit[8]uril: Its Implication in Fluorescent Probe for Mercury Ions, *Chem. Commun.*, 2010, **46**, 4073–4075; (o) E. M. Nolan and S. J. Lippard, Tools and Tactics for the Optical Detection of Mercuric Ion, *Chem. Rev.*, 2008, **108**, 3443–3480; (p) M. C. Basheer, S. Alex, K. G. Thomas, C. H. Suresh and S. Das, A Squaraine-based Chemosensor for Hg<sup>2+</sup> and Pb<sup>2+</sup>, *Tetrahedron*, 2006, **62**, 605–610; (q) J. V. Ros-Lis, M. D. Marcos, R. Martínez-Mañez, K. Rurack and J. Soto, A Regenerative Chemodosimeter Based on Metal-Induced Dye Formation for the Highly Selective and Sensitive Optical Determination of Hg<sup>2+</sup> Ions, *Angew. Chem. Inter. Ed.*, 2005, **44**, 4405–4407; (r) J. V. Ros-Lis, R. Martínez-Mañez, K. Rurack, F. Sancenón, J. Soto and M. Spieles, Highly Selective Chromogenic Signaling of Hg<sup>2+</sup> in Aqueous Media at Nanomolar Levels Employing a Squaraine-Based Reporter, *Inorg. Chem.*, 2004, **43**, 5183–5185.

**Table S2.** Overall ( $\beta_i^H$ ) protonation constants of **sbdpa** and **dpa** in aqueous solution at 298.2±0.1 K and in 0.10±0.01 M KNO<sub>3</sub>

| Equilibrium reaction                     | <b>sbdpa</b> | <b>dpa</b> <sup>b</sup> |
|------------------------------------------|--------------|-------------------------|
|                                          |              |                         |
| $L + H^+ \rightleftharpoons HL^+$        | 10.85(2)     | 7.11                    |
| $L + 2 H^+ \rightleftharpoons H_2L^{2+}$ | 14.80(6)     | 9.59                    |
| $L + 3 H^+ \rightleftharpoons H_3L^{3+}$ | 18.12(4)     | –                       |

<sup>a</sup> This work; L denotes the ligand in general; values in parenthesis are standard deviations in the last significant figures. <sup>b</sup>  $T = 293.2$  K,  $I = 0.1$  M in KNO<sub>3</sub>.<sup>28</sup>

**Table S3.** Overall ( $\beta_{M_mH_nL_l}$ ) stability constants of the complexes of **sbdpa** and **dpa** with Hg<sup>2+</sup>, Cu<sup>2+</sup> and Zn<sup>2+</sup> in aqueous solution at 298.2 K±0.1 in 0.10±0.01 M KNO<sub>3</sub>

| Equilibrium reaction <sup>a</sup>                           | $\log \beta_{M_mH_nL_l}$ |                  |                  |                         |                  |                  |
|-------------------------------------------------------------|--------------------------|------------------|------------------|-------------------------|------------------|------------------|
|                                                             | <b>sbdpa</b>             |                  |                  | <b>dpa</b> <sup>b</sup> |                  |                  |
|                                                             | Hg <sup>2+</sup>         | Cu <sup>2+</sup> | Zn <sup>2+</sup> | Hg <sup>2+</sup>        | Cu <sup>2+</sup> | Zn <sup>2+</sup> |
| $M^{2+} + H^+ + L \rightleftharpoons [M^H L]$               | 18.06(5)                 | 16.01(3)         |                  |                         |                  |                  |
| $M^{2+} + L \rightleftharpoons [M^{II} L]$                  | 14.60(4)                 | 11.75(4)         | 8.4(1)           | 13.85                   | 7.63             |                  |
| $M^{2+} + L \rightleftharpoons [M^{II} LOH] + H^+$          |                          | 3.18(5)          |                  |                         |                  |                  |
| $M^{II} + L \rightleftharpoons [M^{II} L(OH)_2] + 2H^+$     |                          | -7.28(6)         |                  |                         |                  |                  |
| $M^{2+} + 2 L \rightleftharpoons [M^{II} L_2]$              |                          |                  |                  | 22.25                   | 18.5             | 12.15            |
| $2 M^{2+} + H^+ + L \rightleftharpoons [M_2^{II} HL]$       |                          | 19.76(7)         | 17.84(4)         |                         |                  |                  |
| $2 M^{II} + L \rightleftharpoons [M_2^{II} L]$              | 18.97(9)                 | 16.30(7)         | 13.14(7)         |                         |                  |                  |
| $2 M^{II} + L \rightleftharpoons [M_2^{II} LOH] + H^+$      |                          | 9.43(9)          | 5.9(1)           |                         |                  |                  |
| $2 M^{II} + L \rightleftharpoons [M_2^{II} L(OH)_2] + 2H^+$ |                          | 1.64(9)          | -1.4(1)          |                         |                  |                  |
| $2 M^{II} + L \rightleftharpoons [M_2^{II} L(OH)_3] + 3H^+$ |                          | -7.2(1)          | -9.5(1)          |                         |                  |                  |
| $2 M^{II} + L \rightleftharpoons [M_2^{II} L(OH)_4] + 4H^+$ |                          | -17.0(1)         | -19.6(1)         |                         |                  |                  |

<sup>a</sup> This work; L denotes the ligand in general; values in parenthesis are standard deviations in the last significant figures. <sup>b</sup>  $T = 293.2$  K,  $I = 0.1$  M in KNO<sub>3</sub>, G. Anderegg, E. Hubmann, N. G. Podder and F. Wenk, XI. Pyridinderivate als Komplexbildner. XI. Die Thermodynamik der Metallkomplexbildung mit Bis-, Tris- und Tetrakis [(2-pyridyl)methyl]-aminen, *Helv. Chim. Acta*, 1977, **60**, 123–140.

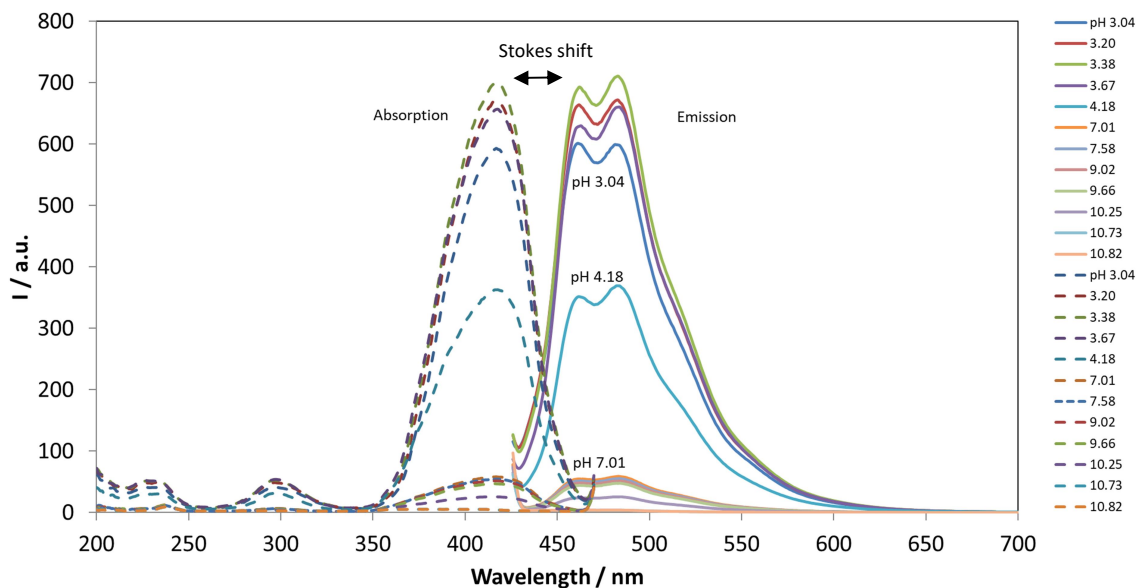

**Fig. S1** Absorption and emission spectra of **sbdpa** in aqueous solution with pH variations at  $C_L = 1.3 \times 10^{-3}$  M and  $T = 298.2$  K.  $\lambda_{exc} = 420$  nm.

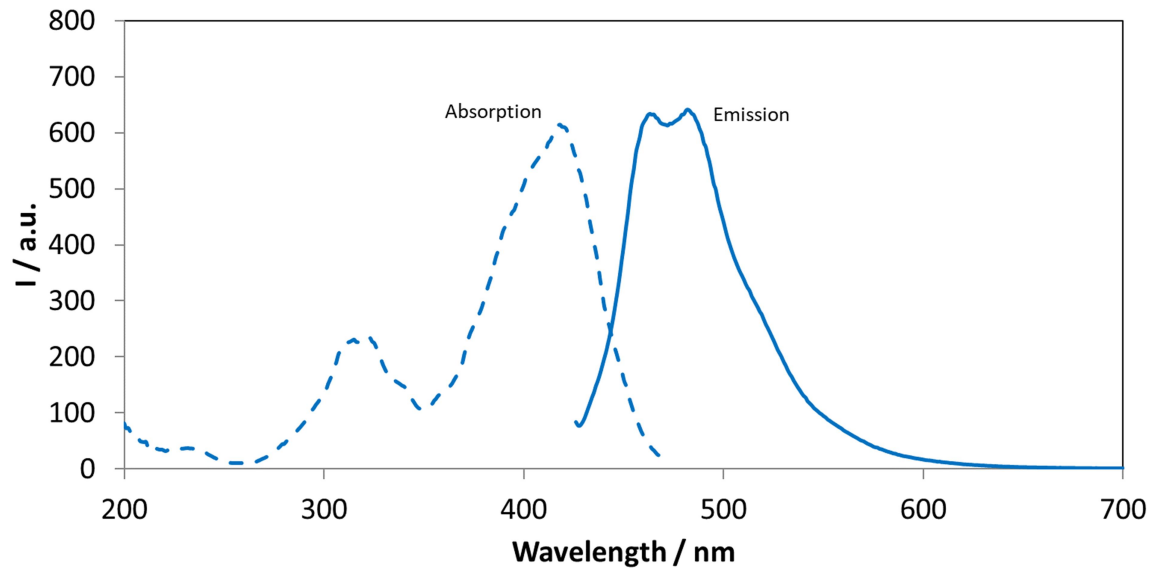

**Fig. S2** Absorption and emission spectra of the complex of **sbdpa** with  $Hg^{2+}$  1:1 M:L in aqueous solution at pH 3.1;  $C_L = 1.3 \times 10^{-3}$  M;  $T = 298.2$  K.  $\lambda_{exc} = 340$  nm.

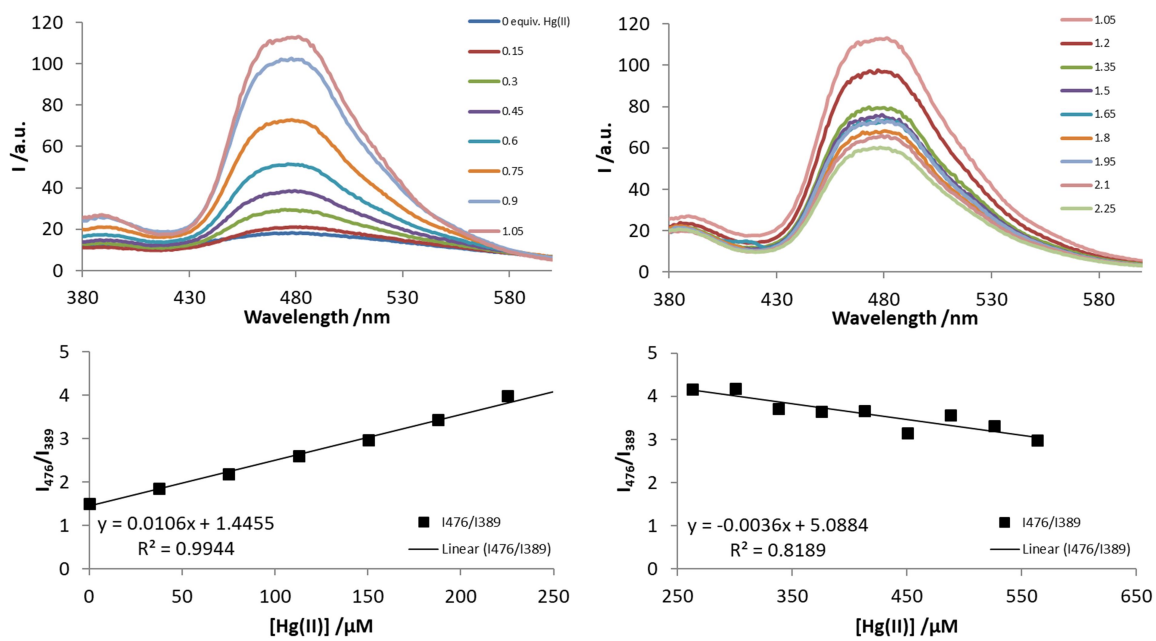

**Fig. S3** Fluorescence intensity change of **sbdpa** ( $2.5 \times 10^{-5}$  M) upon titration with  $\text{Hg}(\text{NO}_3)_2$  in aqueous buffered solution with MES ( $2.5 \times 10^{-3}$  M) at pH 5.0 and  $T = 298.2$  K.  $\lambda_{\text{exc}} = 340$  nm.

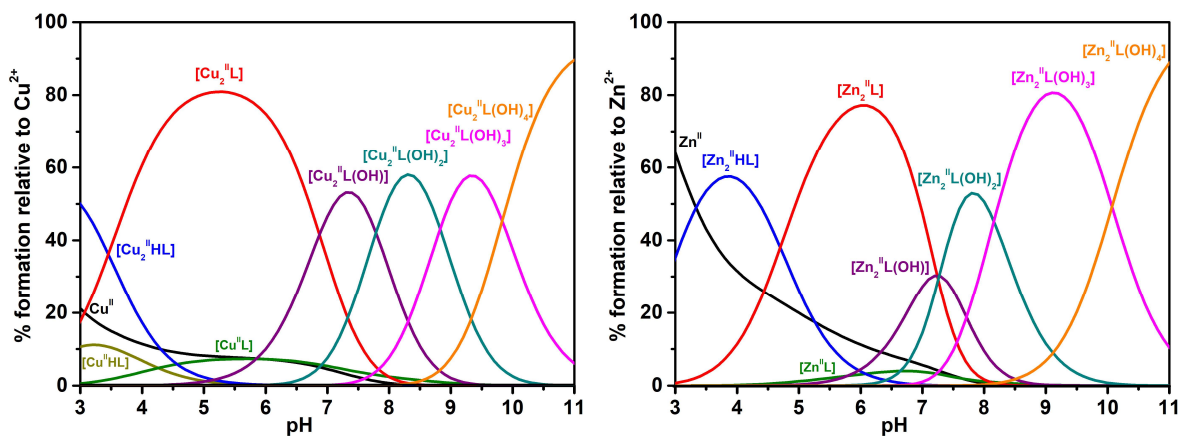

**Fig. S4** Species distribution diagrams calculated for the complexes of **sbdpa** with  $\text{Cu}^{2+}$  and  $\text{Zn}^{2+}$  cations at 2:1 M:L ratio.  $C_M = 2C_L = 2.0 \times 10^{-3}$  M. L denotes the ligand.

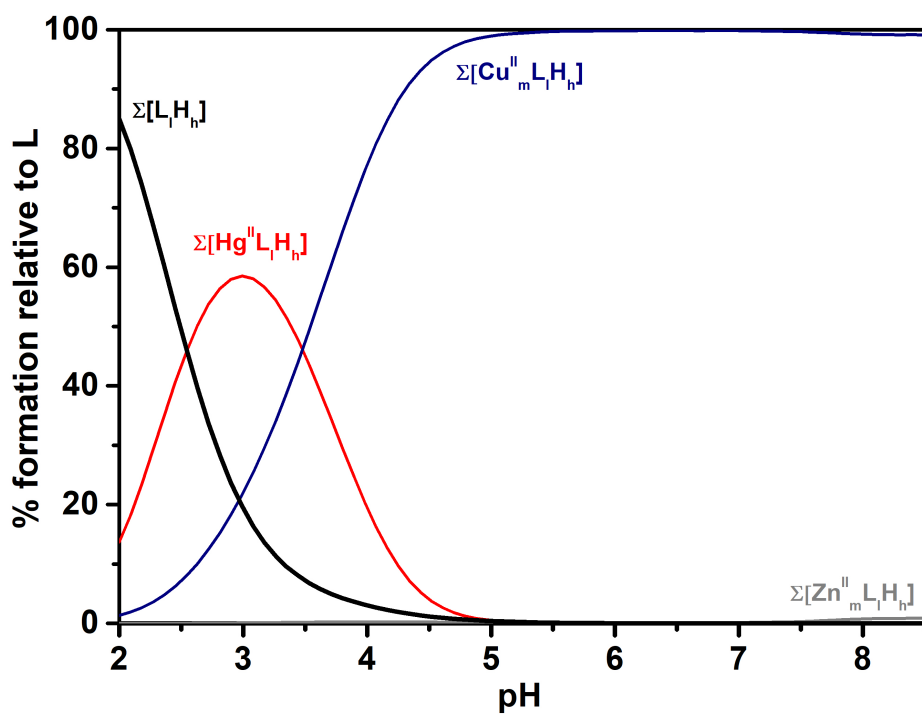

**Fig. S5** Competition distribution diagram of the overall amounts of the **sbdpa** in function of pH in presence of  $Hg^{2+}$ ,  $Cu^{2+}$ , and  $Zn^{2+}$  in the 1:1:5:5 ratio.  $C_{Hg^{2+}} = C_L = 2.5 \times 10^{-5}$  M,  $C_{Cu^{2+}} = C_{Zn^{2+}} = 1.25 \times 10^{-4}$  M. L denotes the **sbdpa** ligand.

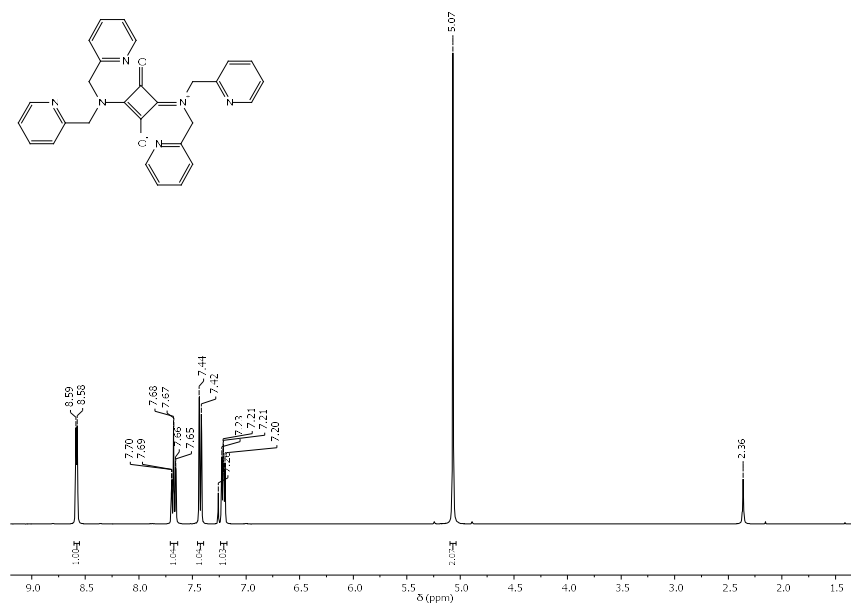

**Fig. S6**  $^1\text{H-NMR}$  spectrum of **sbdpa** in  $\text{CDCl}_3$ .

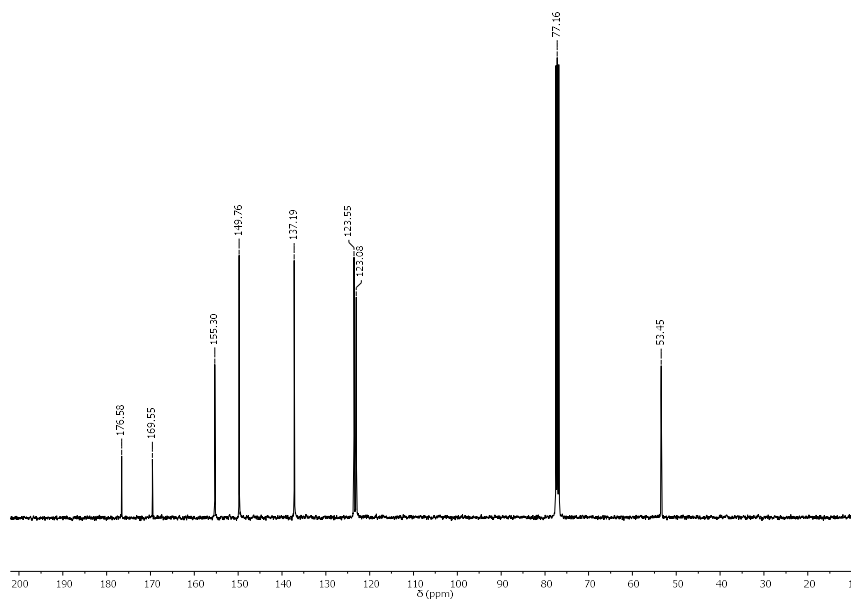

**Fig. S7**  $^{13}\text{C-NMR}$  spectrum of **sbdpa** in  $\text{CDCl}_3$ .

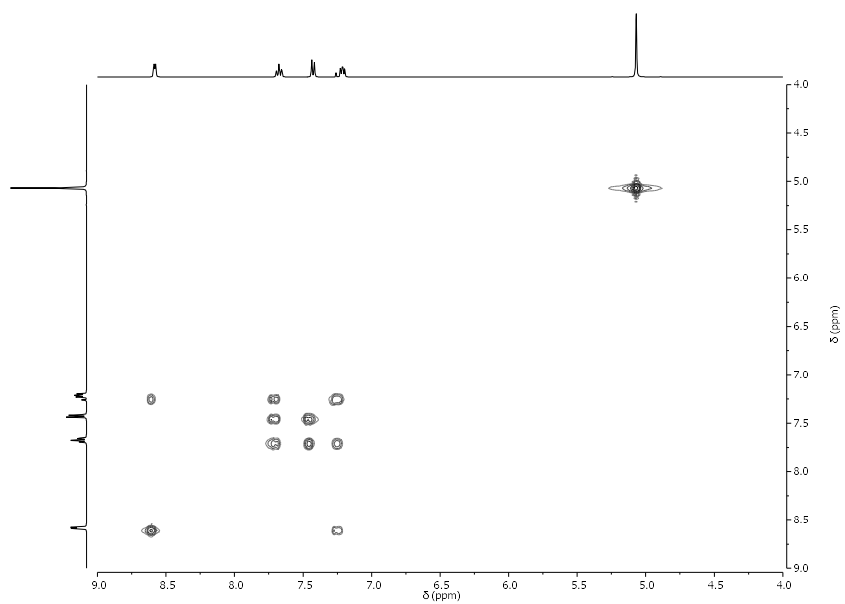

**Fig. S8** COSY spectrum of **sbdpa** in  $\text{CDCl}_3$ .

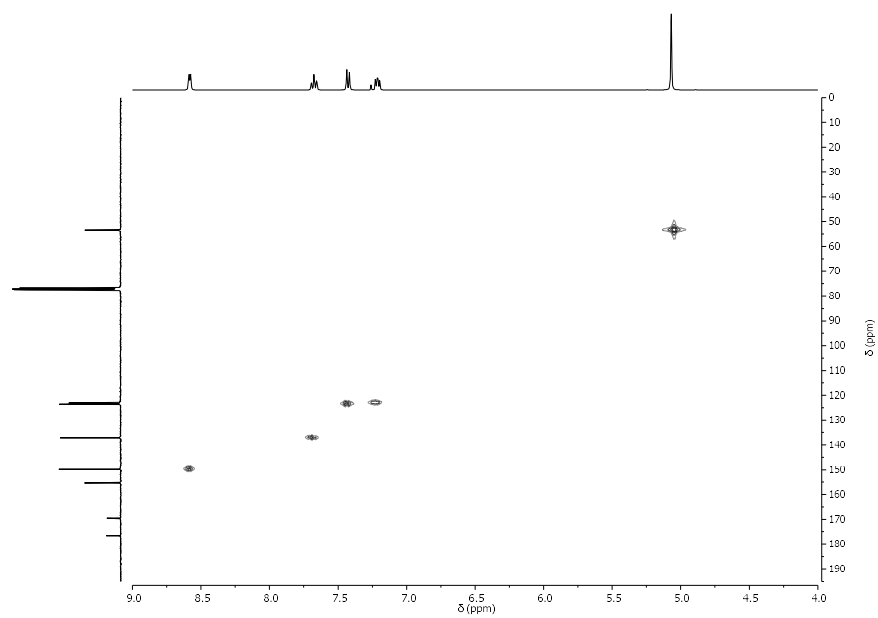

**Fig. S9** HMBC spectrum of **sbdpa** in  $\text{CDCl}_3$ .



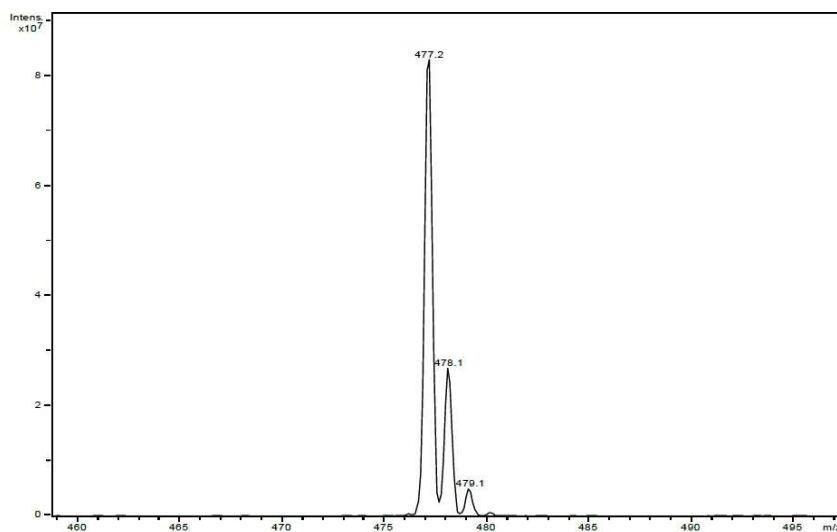

Fig. S10 ESI mass spectrum of **sbdpa** in H<sub>2</sub>O/MeOH.

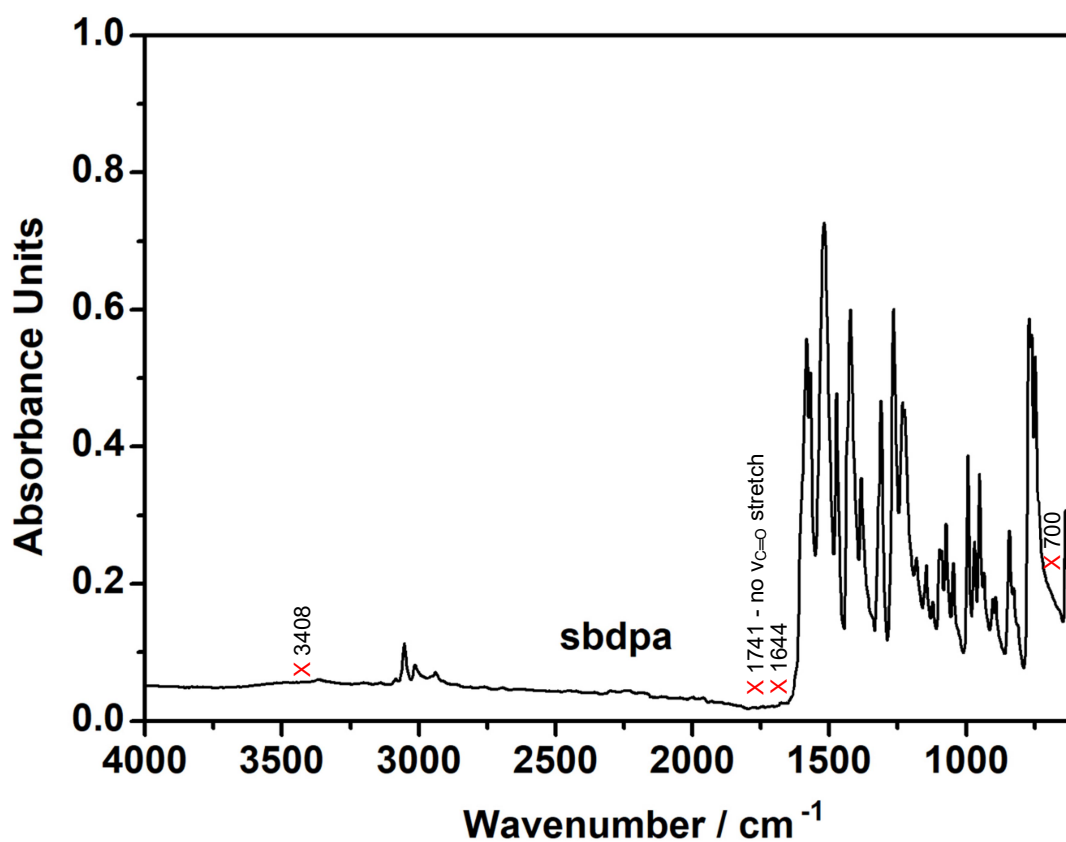

Fig. S11 ATR-FTIR spectrum from **sbdpa** recorded at room temperature; no characteristic  $\nu_{\text{C=O}}$  bands found at  $\cong 1700 \text{ cm}^{-1}$ , nor typical water bands at 3408, 1644, and 700  $\text{cm}^{-1}$ , supporting the fact that **sbdpa** is in its zwitterionic form, and that it is not an hydrate although it is recrystallized from water.

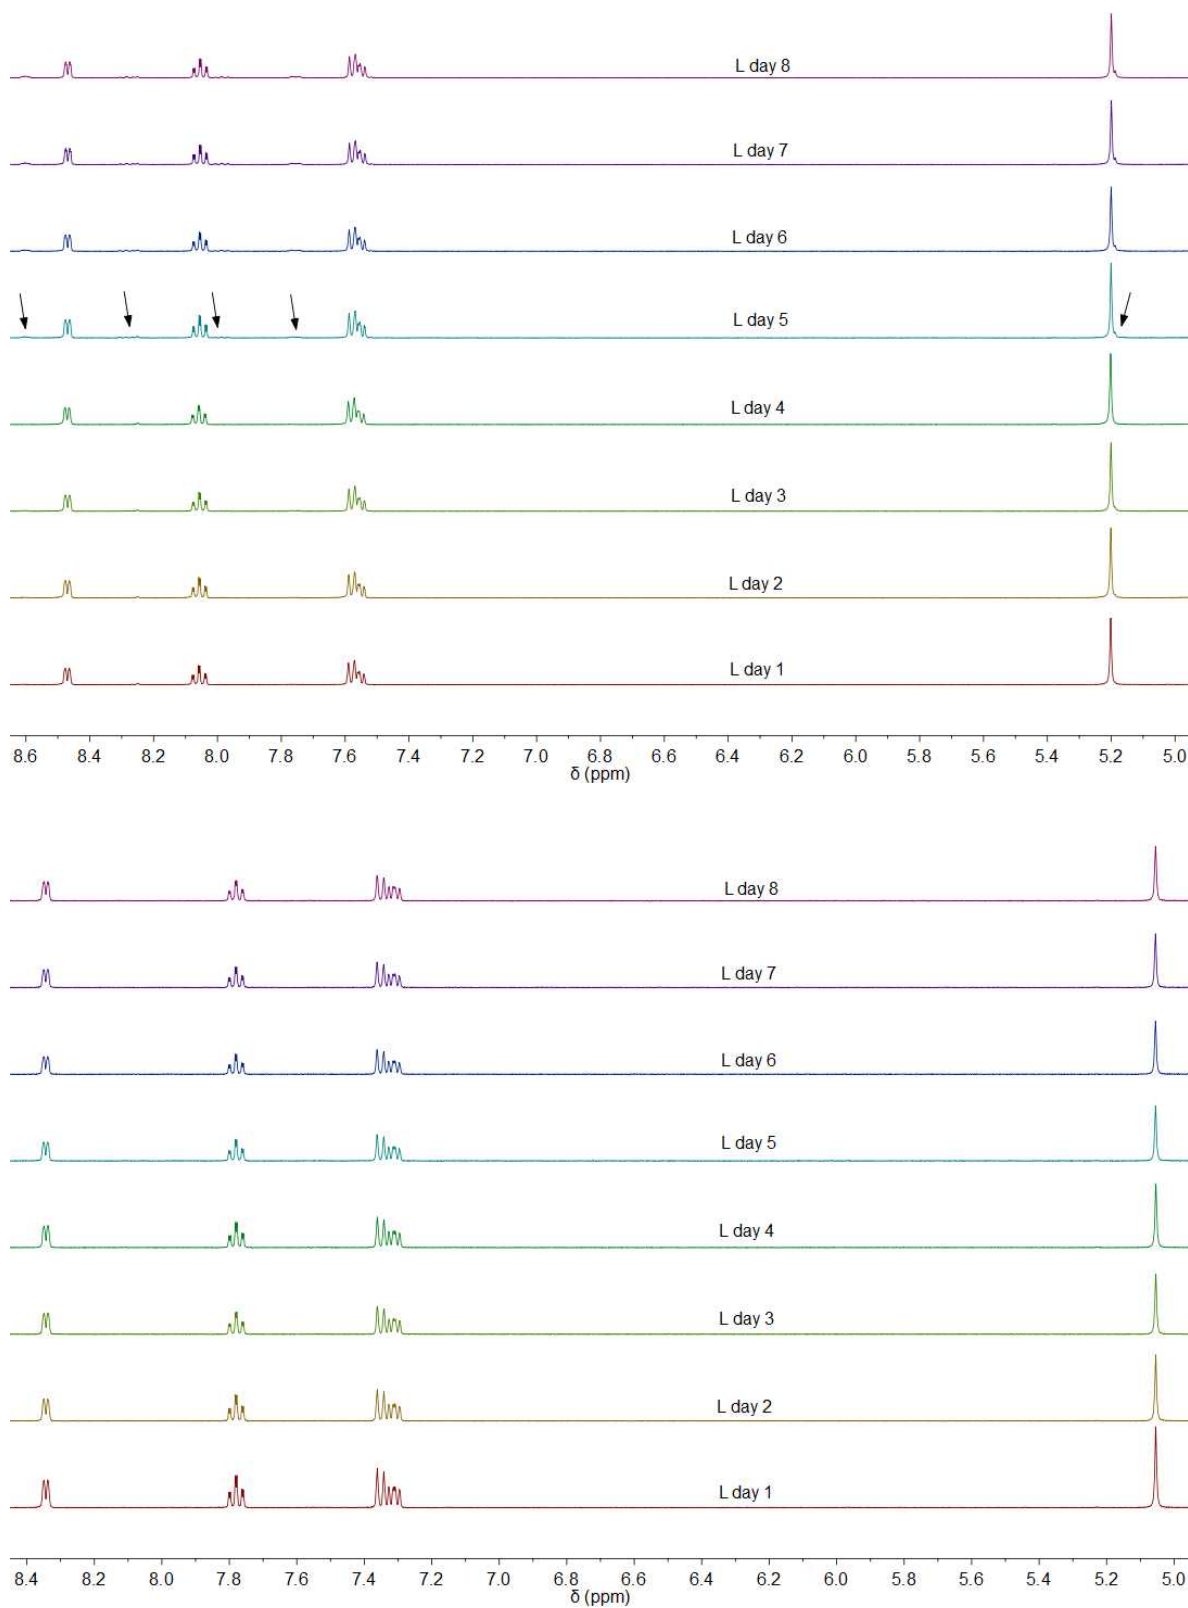

**Fig. S12** Evolution of <sup>1</sup>H-NMR spectra of **sbdpa** in D<sub>2</sub>O with time at pD 3.39 (top) and pD 7.63 (bottom).
